# Supplementary material
Source: Springer Nature journal article supplement (https://www.springermedizin.de/resource/supplementary/12913_2008_671_MOESM3_ESM.pdf/9535286)
Supplement: MOESM3 [file 9535286]

# Negative scores

| Node 0    |       |
|-----------|-------|
| Mean      | 3.846 |
| Std. Dev. | 3.466 |
| n         | 117   |
| %         | 100.0 |
| Predicted | 3.846 |

GafF\_improvement  
Improvement=1.632

$\leq -9.00$

$> -9.00$

| Node 1    |       |
|-----------|-------|
| Mean      | 8.375 |
| Std. Dev. | 4.470 |
| n         | 8     |
| %         | 6.8   |
| Predicted | 8.375 |

| Node 2    |       |
|-----------|-------|
| Mean      | 3.514 |
| Std. Dev. | 3.158 |
| n         | 109   |
| %         | 93.2  |
| Predicted | 3.514 |

Age

Improvement=0.885

$\leq 48.50$

$> 48.50$

| Node 3    |       |
|-----------|-------|
| Mean      | 4.073 |
| Std. Dev. | 3.347 |
| n         | 82    |
| %         | 70.1  |
| Predicted | 4.073 |

| Node 4    |       |
|-----------|-------|
| Mean      | 1.815 |
| Std. Dev. | 1.594 |
| n         | 27    |
| %         | 23.1  |
| Predicted | 1.815 |
